# Supplementary material for: Controlled synthesis of upconverting nanoparticles/CuS yolk–shell nanoparticles for in vitro synergistic photothermal and photodynamic therapy of cancer cells
Source: Royal Society of Chemistry journal article supplement (doi:10.1039/c7tb02733h), 2017-01-01
Supplement: c7tb02733h1.pdf [file c7tb02733h1.pdf]

# Controlled Synthesis of Upconverting Nanoparticles/CuS Yolk-Shell Nanoparticles for in Vitro Synergistic Photothermal and Photodynamic Therapy of Cancer Cells

Chen-Xi Huang,<sup>a,#</sup> Hua-Jian Chen,<sup>a,#</sup> Fei Li,<sup>b,#</sup> Wan-Ni Wang,<sup>a,#</sup> Dong-Dong Li,<sup>c,#</sup> Xian-Zhu Yang,<sup>c</sup>

Zhao-Hua Miao,<sup>a</sup> Zheng-Bao Zha,<sup>a,\*</sup> Yang, Lu,<sup>b,\*</sup> and Hai-Sheng Qian,<sup>\*,a,d</sup>

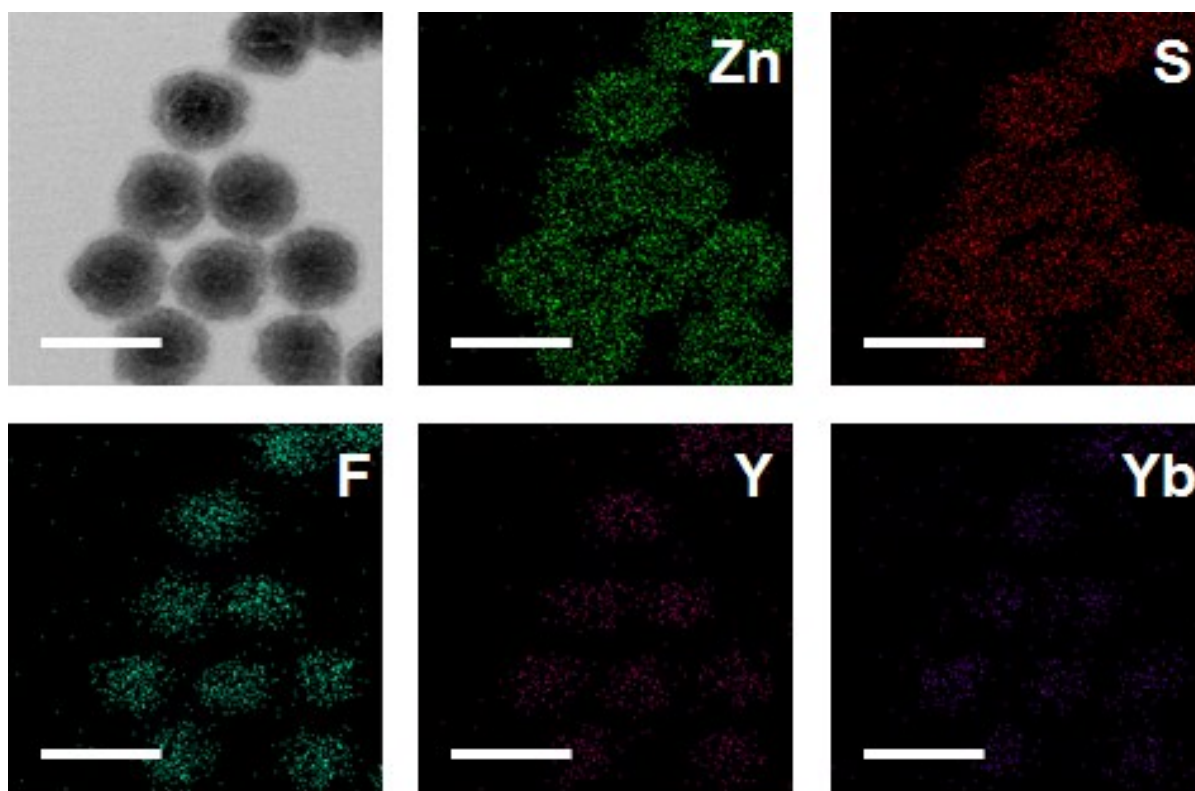

**Fig. S1.** STEM image and elemental mapping images of UCNPs@ZnS core-shell nanoparticles.

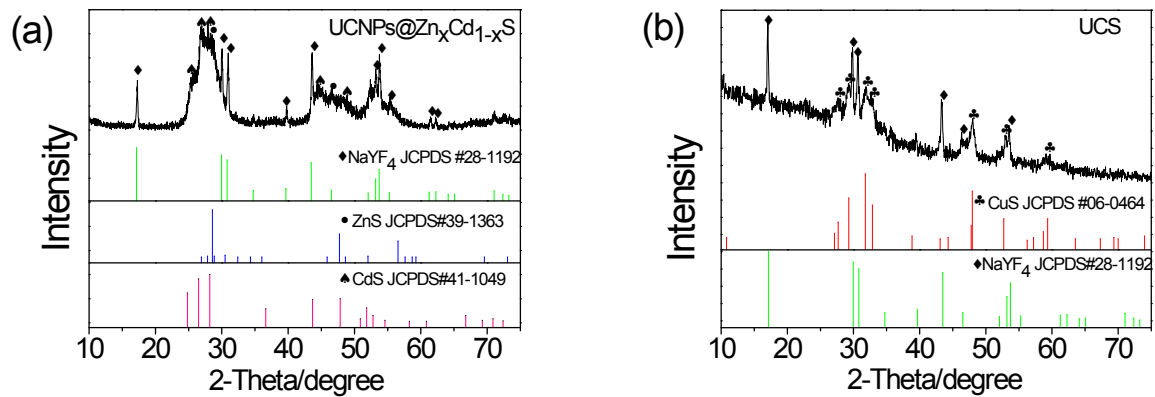

**Fig. S2.** X-ray diffraction patterns of the as-prepared (a) UCNPs@Zn<sub>x</sub>Cd<sub>1-x</sub>S, and (b) UCS nanoparticles.

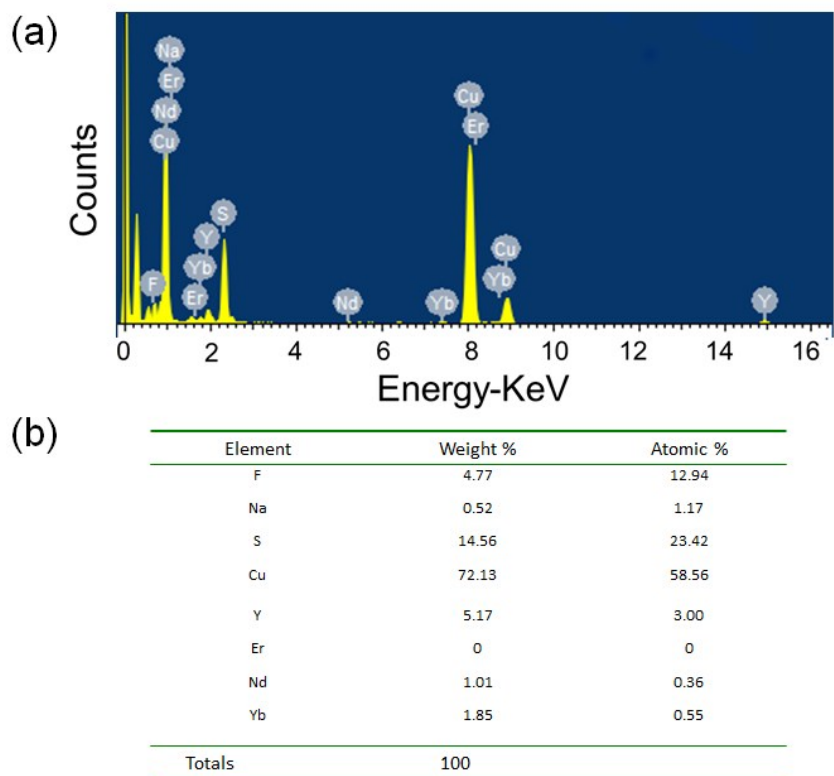

**Fig. S3.** (a) The energy dispersive X-ray (EDX) spectra and (b) the chemical composition of the UCNPs@CuS yolk-shell nanoparticles.

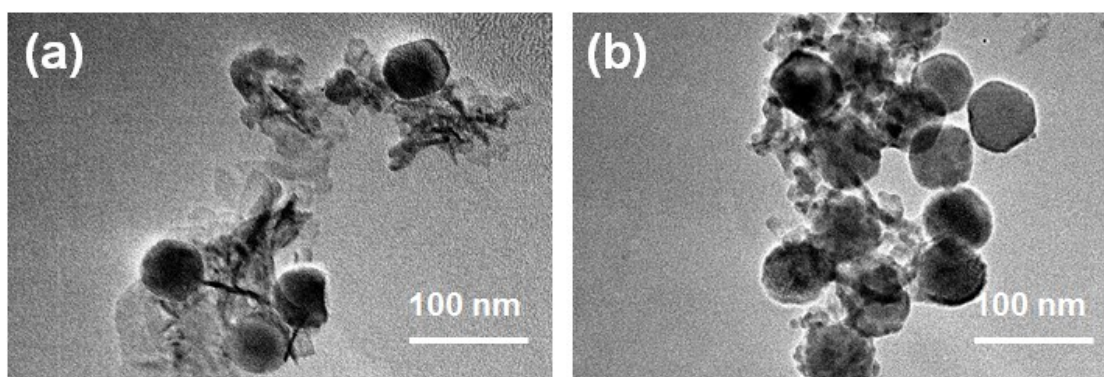

**Fig. S4.** TEM images of the as-prepared samples were obtained from UC@ZnS and Cu<sup>2+</sup> in different reaction media: (a) aqueous solution; and (b) ethanol.

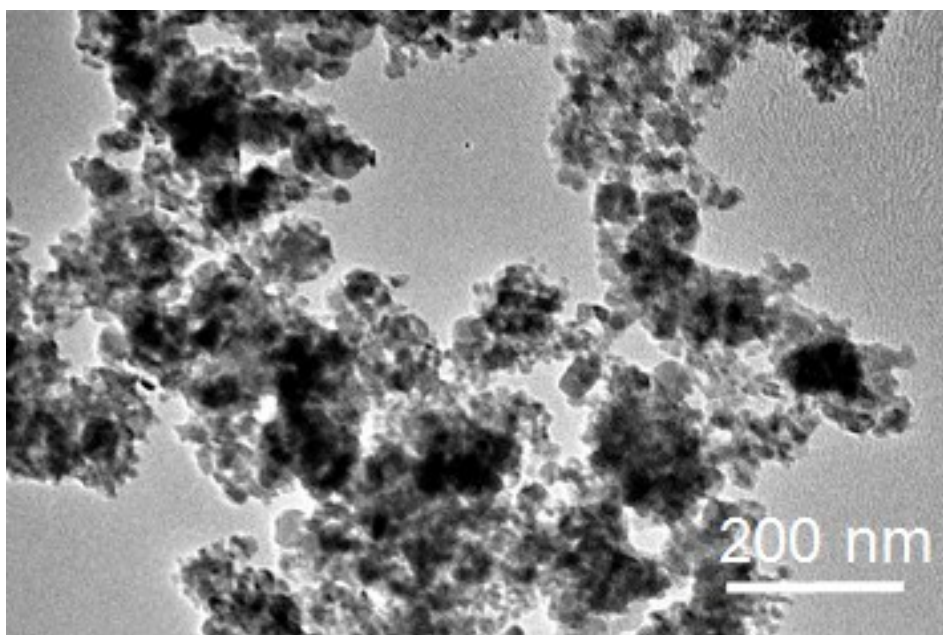

**Fig. S5.** TEM image of the sample obtained from UCNPs@Zn<sub>x</sub>Cd<sub>1-x</sub>S and Cu<sup>2+</sup> in aqueous solution via the ions exchanging reaction.

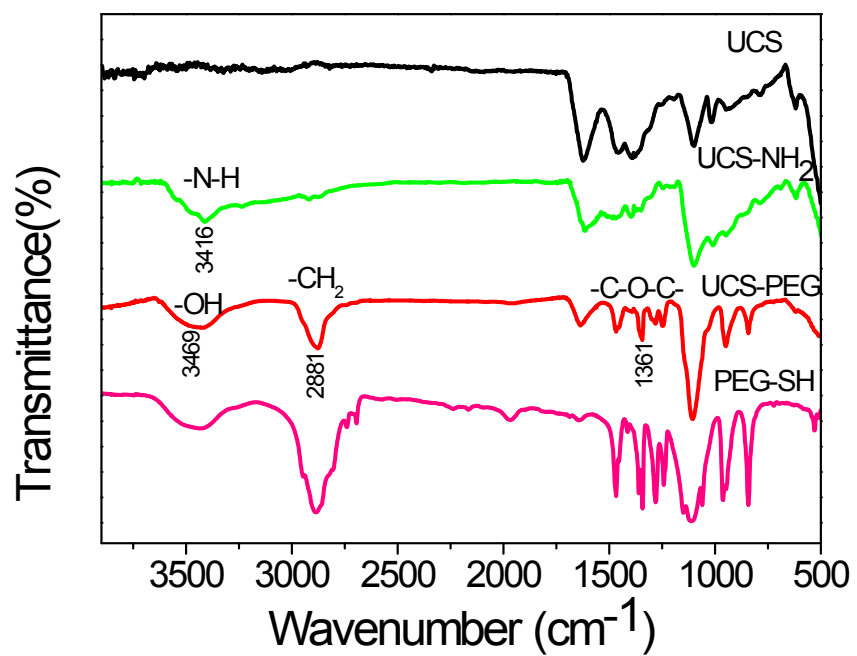

**Fig. S6.** FTIR spectra of UCS, UCS-NH<sub>2</sub>, UCS-PEG and pure PEG-SH.

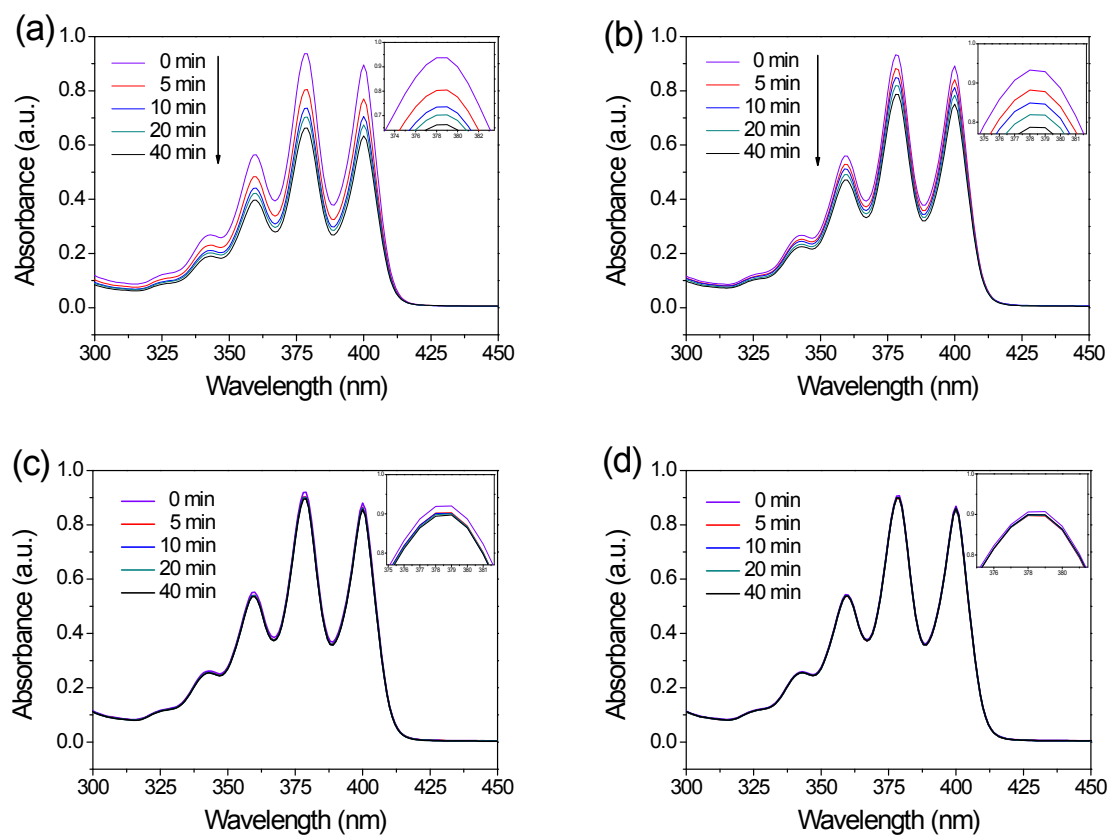

**Fig. S7.** UV-Vis absorption spectra of the solution of ABDA in presence of UCS (a) and CuS hollow nanospheres(b) exposed to 6W/cm<sup>2</sup> of 808 nm laser, indicating the production of <sup>1</sup>O<sub>2</sub> species.(c, d) UV-Vis absorption spectra of the solution of ABDA in presence of UCS (c) and CuS hollow nanospheres (d) without irradiation of the laser.

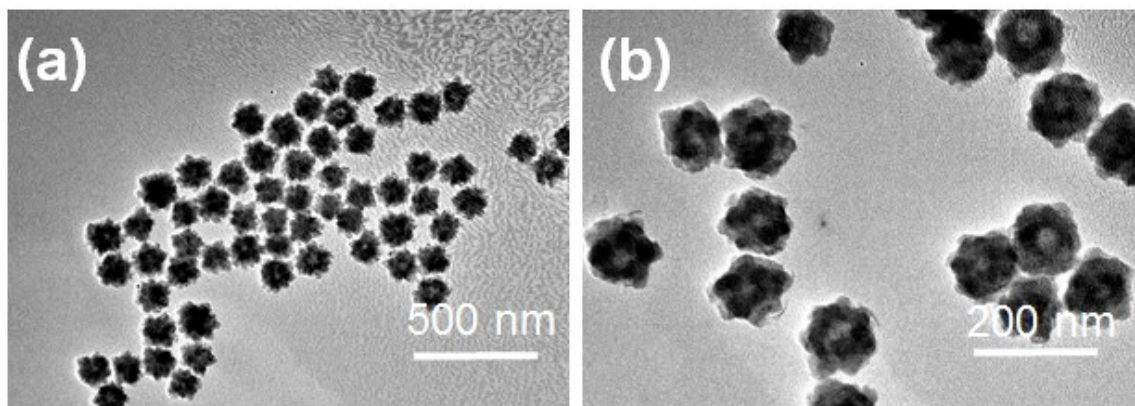

**Fig. S8.** TEM images of (a)  $Zn_xCd_{1-x}S$  hollow nanospheres, and (b) CuS hollow nanospheres.

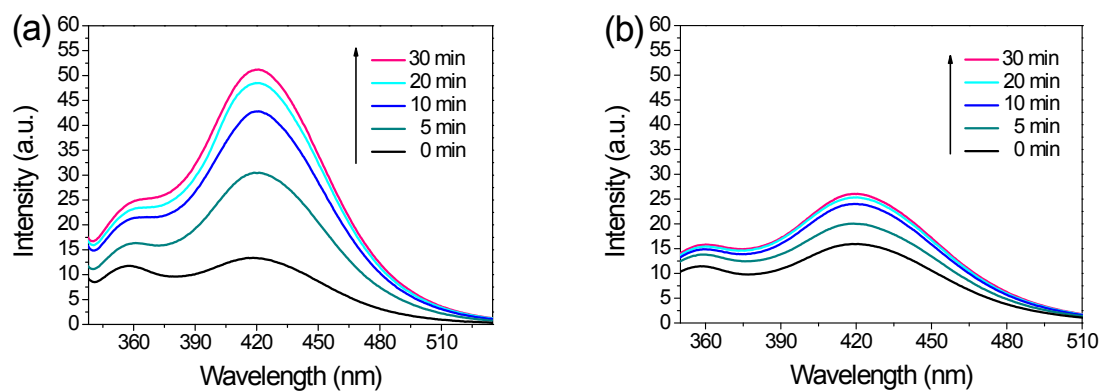

**Fig. S9.** (a) Fluorescence spectra of terephthalic acid (TAOH) with the addition of UCS (a), and CuS hollow nanospheres excited by an 808 nm CW laser.



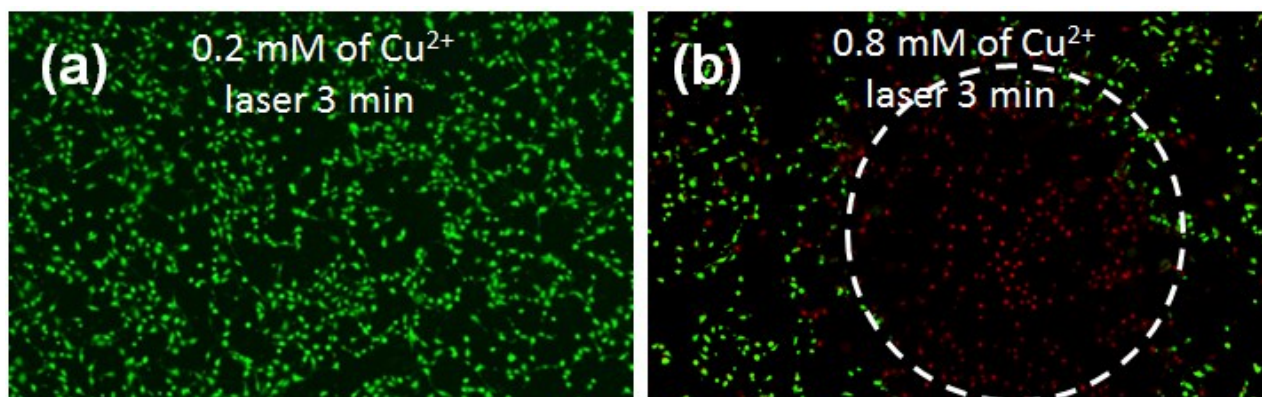

**Fig. S10.** The localized photothermal destruction of 4T1 cancer cells treated with different amount of UCS with various  $\text{Cu}^{2+}$  concentration exposed to laser for 3 min (808 nm, 6 W/cm<sup>2</sup>): (a) 0.2 mM  $\text{Cu}^{2+}$ ; (b) 0.8 mM  $\text{Cu}^{2+}$ .

**Table S1.** Cell apoptosis in presence of UCS under different condition.

| Apoptosis of cell<br>Experimental group | Concentration           |                         |
|-----------------------------------------|-------------------------|-------------------------|
|                                         | 0.2 mM $\text{Cu}^{2+}$ | 0.4 mM $\text{Cu}^{2+}$ |
| CuS+ laser                              | 31.63%                  | 46.87%                  |
| UCS+VC+laser                            | 28.06%                  | 46.16%                  |
| UCS+ laser                              | 41.75%                  | 60.65%                  |
